# Supplementary material
Source: publisher figshare collection journal article supplement (https://brill.figshare.com/articles/dataset/_/19597486)
Supplement: Supplementary file 1 [file 1]

# **Sex-relevant genes in the embryo stage of Chinese soft-shelled turtles as revealed by RNA-Seq analysis**

**Xianwen Zhou<sup>1,2</sup>, Hui Luo<sup>3</sup>, Dan Zeng<sup>1</sup>, Yazhou Hu<sup>1</sup>, Pei Wang<sup>1</sup>, Gang Xiong<sup>4,\*</sup> and  
Xiaoqing Wang<sup>1,\*</sup>**

<sup>1</sup> College of Animal Science & Technology, Hunan Agricultural University, Changsha 410128, Hunan, China

<sup>2</sup> Affair Center of Animal Husbandry and Aquaculture in XiangXi Autonomous Prefecture, Jishou 416000, Hunan, China

<sup>3</sup> Key Laboratory of Freshwater Fish Reproduction and Development (Ministry of Education), Southwest University College of Animal Science, Chongqing 400715, China

<sup>4</sup> Department of Animal Science and Technology, Hunan Biological Electromechanical Vocational and Technical College, Changsha 410126, Hunan, China

\*Corresponding author; e-mails: wangxiao8259@126.com; xionggang709@126.com

## **Supplementary material**

**Table S1.**

Summary of clean data using the Illumina Hiseq X Ten platform.

| Stages              | Sample | Clean<br>reads<br>pairs | Clean base<br>(bp) | Length  | Q20 (%)   | Q30 (%)   | GC (%)    |
|---------------------|--------|-------------------------|--------------------|---------|-----------|-----------|-----------|
| Male in gonadal sex | A1     | 24,709,984              | 7,412,995,200      | 150;150 | 96.7;96.8 | 92.7;92.6 | 51.4;51.3 |
| differentiation     | A2     | 34,552,664              | 10,365,799,200     | 150;150 | 95.2;92.0 | 93.6;88.8 | 48.8;48.6 |
| stages              | A3     | 38,637,511              | 11,591,253,300     | 150;150 | 95.0;91.8 | 93.4;88.7 | 49.9;49.8 |
| Female in gonadal   | B1     | 24,313,629              | 7,294,088,700      | 150;150 | 96.5;96.3 | 92.2;91.6 | 55.8;55.8 |
| sex differentiation | B2     | 24,843,892              | 7,453,167,600      | 150;150 | 96.4;96.3 | 92.0;91.8 | 56.7;56.7 |
| stages              | B3     | 23,315,748              | 6,994,724,400      | 150;150 | 97.1;95.7 | 95.6;93.7 | 55.5;55.5 |
| Male in sex         | C1     | 18,886,099              | 5,665,829,700      | 150;150 | 96.5;94.8 | 91.7;88.4 | 52.0;51.8 |
| determination       | C2     | 19,154,060              | 5,746,218,000      | 150;150 | 96.5;95.1 | 91.7;88.9 | 51.7;51.6 |
| stages              | C3     | 21,580,489              | 6,474,146,700      | 150;150 | 96.4;95.0 | 91.5;88.8 | 52.5;52.3 |
| Female in sex       | D1     | 26,366,637              | 7,909,991,100      | 150;150 | 96.5;94.4 | 91.7;87.5 | 51.9;51.7 |
| determination       | D2     | 21,256,419              | 6,376,925,700      | 150;150 | 96.5;95.3 | 91.7;89.4 | 52.9;52.7 |
| stages              | D3     | 19,449,892              | 5,834,967,600      | 150;150 | 96.6;95.5 | 91.7;89.6 | 52.4;52.2 |
| Male in shelling    | E1     | 27,690,009              | 8,307,002,700      | 150;150 | 97.1;95.7 | 93.2;89.5 | 52.7;52.6 |
| stage               | E2     | 29,140,514              | 8,742,154,200      | 150;150 | 97.2;95.8 | 93.4;89.8 | 54.1;54.0 |
|                     | E3     | 26,368,246              | 7,910,473,800      | 150;150 | 97.2;95.9 | 93.3;90.1 | 55.1;55.1 |
| Female in shelling  | F1     | 29,425,992              | 8,827,797,600      | 150;150 | 97.0;96.2 | 93.1;90.9 | 54.5;54.4 |
| stages              | F2     | 28,082,744              | 8,424,823,200      | 150;150 | 97.2;95.9 | 93.3;89.9 | 52.6;52.6 |
|                     | F3     | 26,227,180              | 7,868,154,000      | 150;150 | 97.2;96.2 | 93.4;90.7 | 54.3;54.3 |

**Table S2.**

Each sample aligned to the reference genome total reads of Chinese soft-shelled turtles.

| Sample | Total reads | Total mapping<br>rate | Left reads<br>mapped  | Left reads<br>multiple<br>mapped | Right reads<br>mapped | Right reads<br>multiple<br>mapped |
|--------|-------------|-----------------------|-----------------------|----------------------------------|-----------------------|-----------------------------------|
| A1     | 49,419,968  | 31,158,210<br>(63.0%) | 15,579,958<br>(63.1%) | 494,087<br>(3.2%)                | 15,578,252<br>(63.0%) | 504,151<br>(3.2%)                 |
| A2     | 69,105,328  | 42,469,949<br>(61.5%) | 22,019,432<br>(63.7%) | 573,605<br>(2.6%)                | 20,450,517<br>(59.2%) | 524,469<br>(2.6%)                 |
| A3     | 77,275,022  | 44,728,979<br>(57.9%) | 23,201,271<br>(60.0%) | 684,662<br>(3.0%)                | 21,527,708<br>(55.7%) | 625,690<br>(2.9%)                 |
| B1     | 48,627,258  | 26,114,355<br>(53.7%) | 13,078,383<br>(53.8%) | 348,154<br>(2.7%)                | 13,035,972<br>(53.6%) | 352,172<br>(2.7%)                 |
| B2     | 49,687,784  | 25,278,526<br>(50.9%) | 12,633,715<br>(50.9%) | 430,030<br>(3.4%)                | 12,644,811<br>(50.9%) | 438,033<br>(3.5%)                 |
| B3     | 46,631,496  | 25,435,971<br>(54.5%) | 12,846,608<br>(55.1%) | 384,222<br>(3.0%)                | 12,589,363<br>(54.0%) | 382,014<br>(3.0%)                 |
| C1     | 37,772,198  | 22,273,692<br>(59.0%) | 11,535,254<br>(61.1%) | 240,786<br>(2.1%)                | 10,738,438<br>(56.9%) | 225,310<br>(2.1%)                 |
| C2     | 38,308,120  | 22,580,943<br>(58.9%) | 11,628,997<br>(60.7%) | 251,778<br>(2.2%)                | 10,951,946<br>(57.2%) | 236,924<br>(2.2%)                 |
| C3     | 43,160,978  | 24,569,679<br>(56.9%) | 12,663,041<br>(58.7%) | 276,160<br>(2.2%)                | 11,906,638<br>(55.2%) | 261,152<br>(2.2%)                 |
| D1     | 52,733,274  | 31,298,635<br>(59.4%) | 16,327,741<br>(61.9%) | 339,239<br>(2.1%)                | 14,970,894<br>(56.8%) | 315,695<br>(2.1%)                 |
| D2     | 42,512,838  | 24,584,209<br>(57.8%) | 12,603,998<br>(59.3%) | 266,521<br>(2.1%)                | 11,980,211<br>(56.4%) | 255,334<br>(2.1%)                 |
| D3     | 38,899,784  | 22,838,520<br>(58.7%) | 11,700,064<br>(60.2%) | 249,632<br>(2.1%)                | 11,138,456<br>(57.3%) | 237,722<br>(2.1%)                 |

|    |            |            |            |         |            |         |
|----|------------|------------|------------|---------|------------|---------|
| E1 | 55,380,018 | 31,543,075 | 16,104,160 | 311,499 | 15,438,915 | 297,984 |
|    |            | (57.0%)    | (58.2%)    | (1.9%)  | (55.8%)    | (1.9%)  |
| E2 | 58,281,028 | 32,117,296 | 16,388,728 | 320,140 | 15,728,568 | 311,244 |
|    |            | (55.1%)    | (56.2%)    | (2.0%)  | (54.0%)    | (2.0%)  |
| E3 | 52,736,492 | 27,951,571 | 14,231,253 | 359,773 | 13,720,318 | 352,240 |
|    |            | (53.0%)    | (54.0%)    | (2.5%)  | (52.0%)    | (2.6%)  |
| F1 | 58,851,984 | 30,175,676 | 15,258,560 | 393,529 | 14,917,116 | 383,344 |
|    |            | (51.3%)    | (51.9%)    | (2.6%)  | (50.7%)    | (2.6%)  |
| F2 | 56,165,488 | 32,423,269 | 16,529,416 | 363,604 | 15,893,853 | 350,080 |
|    |            | (57.7%)    | (58.9%)    | (2.2%)  | (56.6%)    | (2.2%)  |
| F3 | 52,454,360 | 27,757,051 | 14,070,685 | 346,991 | 13,686,366 | 340,640 |
|    |            | (52.9%)    | (53.6%)    | (2.5%)  | (52.2%)    | (2.5%)  |

---

**Table S3.**

Summary of sample reads and their mapping status.

| Sample | Total read pairs | Total mapped reads  | Uniq mapped reads  | Multiple mapped reads |
|--------|------------------|---------------------|--------------------|-----------------------|
| A1     | 24,709,984       | 14,517,388 (58.75%) | 3,456,903 (13.99%) | 11,060,485 (44.76%)   |
| A2     | 34,552,664       | 20,809,298 (60.22%) | 4,596,356 (13.30%) | 16,212,942 (46.92%)   |
| A3     | 38,637,511       | 22,344,985 (57.83%) | 5,175,927 (13.40%) | 17,169,058 (44.44%)   |
| B1     | 24,313,629       | 11,567,834 (47.58%) | 2,592,375 (10.66%) | 8,975,459 (36.92%)    |
| B2     | 24,843,892       | 11,401,288 (45.89%) | 2,677,789 (10.78%) | 8,723,499 (35.11%)    |
| B3     | 23,315,748       | 10,989,341 (47.13%) | 2,553,959 (10.95%) | 8,435,382 (36.18%)    |
| C1     | 18,886,099       | 10,194,243 (53.98%) | 2,067,839 (10.95%) | 8,126,404 (43.03%)    |
| C2     | 19,154,060       | 10,643,698 (55.57%) | 2,246,555 (11.73%) | 8,397,143 (43.84%)    |
| C3     | 21,580,489       | 11,442,259 (53.02%) | 2,342,090 (10.85%) | 9,100,169 (42.17%)    |
| D1     | 26,366,637       | 14,326,931 (54.34%) | 2,818,323 (10.69%) | 11,508,608 (43.65%)   |
| D2     | 21,256,419       | 11,158,127 (52.49%) | 2,391,190 (11.25%) | 8,766,937 (41.24%)    |
| D3     | 19,449,892       | 10,470,688 (53.83%) | 2,113,241 (10.87%) | 8,357,447 (42.97%)    |
| E1     | 27,690,009       | 14,521,674 (52.44%) | 3,655,293 (13.20%) | 10,866,381 (39.24%)   |
| E2     | 29,140,514       | 14,623,017 (50.18%) | 3,225,883 (11.07%) | 11,397,134 (39.11%)   |
| E3     | 26,368,246       | 12,551,704 (47.60%) | 3,065,246 (11.62%) | 9,486,458 (35.98%)    |
| F1     | 29,425,992       | 14,413,913 (48.98%) | 3,511,737 (11.93%) | 10,902,176 (37.05%)   |
| F2     | 28,082,744       | 14,756,366 (52.55%) | 3,476,046 (12.38%) | 11,280,320 (40.17%)   |
| F3     | 26,227,180       | 12,794,070 (48.78%) | 2,919,686 (11.13%) | 9,874,384 (37.65%)    |

**Table S4.**

Statistical analysis of differentially expressed genes.

| Sample | Expressed<br>genes | Total<br>genes | 0                  | 0–1                | 1–3               | 3–15              | 15–60            | >60              |
|--------|--------------------|----------------|--------------------|--------------------|-------------------|-------------------|------------------|------------------|
| A1     | 31,202             | 47,265         | 16,063<br>(33.98%) | 12,510<br>(26.47%) | 5,141<br>(10.88%) | 7,826<br>(16.56%) | 4,097<br>(8.67%) | 1,628<br>(3.44%) |
| A2     | 32,047             | 47,265         | 15,218<br>(32.20%) | 13,320<br>(28.18%) | 5,363<br>(11.35%) | 7,728<br>(16.35%) | 4,068<br>(8.61%) | 1,568<br>(3.32%) |
| A3     | 32,237             | 47,265         | 15,028<br>(31.80%) | 13,248<br>(28.03%) | 5,372<br>(11.37%) | 8,002<br>(16.93%) | 4,012<br>(8.49%) | 1,603<br>(3.39%) |
| B1     | 31,095             | 47,265         | 16,170<br>(34.21%) | 11,302<br>(23.91%) | 5,329<br>(11.27%) | 8,189<br>(17.33%) | 4,315<br>(9.13%) | 1,960<br>(4.15%) |
| B2     | 31,888             | 47,265         | 15,377<br>(32.53%) | 11,461<br>(24.25%) | 5,692<br>(12.04%) | 8,611<br>(18.22%) | 4,298<br>(9.09%) | 1,826<br>(3.86%) |
| B3     | 30,607             | 47,265         | 16,658<br>(35.24%) | 10,935<br>(23.14%) | 5,294<br>(11.20%) | 8,128<br>(17.20%) | 4,329<br>(9.16%) | 1,921<br>(4.06%) |
| C1     | 29,129             | 47,265         | 18,136<br>(38.37%) | 10,536<br>(22.29%) | 4,661<br>(9.86%)  | 7,884<br>(16.68%) | 4,304<br>(9.11%) | 1,744<br>(3.69%) |
| C2     | 28,595             | 47,265         | 18,670<br>(39.50%) | 10,528<br>(22.27%) | 4,427<br>(9.37%)  | 7,679<br>(16.25%) | 4,222<br>(8.93%) | 1,739<br>(3.68%) |
| C3     | 29,821             | 47,265         | 17,444<br>(36.91%) | 11,044<br>(23.37%) | 4,845<br>(10.25%) | 7,821<br>(16.55%) | 4,294<br>(9.08%) | 1,817<br>(3.84%) |
| D1     | 30,599             | 47,265         | 16,666<br>(35.26%) | 11,636<br>(24.62%) | 4,699<br>(9.94%)  | 7,982<br>(16.89%) | 4,497<br>(9.51%) | 1,785<br>(3.78%) |
| D2     | 30,075             | 47,265         | 17,190<br>(36.37%) | 10,880<br>(23.02%) | 4,900<br>(10.37%) | 8,214<br>(17.38%) | 4,304<br>(9.11%) | 1,777<br>(3.76%) |
| D3     | 29,536             | 47,265         | 17,729<br>(37.51%) | 10,519<br>(22.26%) | 4,647<br>(9.83%)  | 8,109<br>(17.16%) | 4,437<br>(9.39%) | 1,824<br>(3.86%) |
| E1     | 27,812             | 47,265         | 19,453<br>(41.16%) | 11,583<br>(24.51%) | 4,575<br>(9.68%)  | 6,902<br>(14.60%) | 3,263<br>(6.90%) | 1,489<br>(3.15%) |
| E2     | 28,374             | 47,265         | 18,891<br>(39.97%) | 11,623<br>(24.59%) | 4,645<br>(9.83%)  | 6,932<br>(14.67%) | 3,442<br>(7.28%) | 1,732<br>(3.66%) |
| E3     | 28,013             | 47,265         | 19,252<br>(40.73%) | 11,199<br>(23.69%) | 4,915<br>(10.40%) | 6,982<br>(14.77%) | 3,275<br>(6.93%) | 1,642<br>(3.47%) |
| F1     | 29,717             | 47,265         | 17,548<br>(37.13%) | 11,922<br>(25.22%) | 5,062<br>(10.71%) | 7,647<br>(16.18%) | 3,526<br>(7.46%) | 1,560<br>(3.30%) |
| F2     | 30,234             | 47,265         | 17,031<br>(36.03%) | 12,416<br>(26.27%) | 5,111<br>(10.81%) | 7,557<br>(15.99%) | 3,565<br>(7.54%) | 1,585<br>(3.35%) |
| F3     | 30,108             | 47,265         | 17,157<br>(36.30%) | 11,669<br>(24.69%) | 5,364<br>(11.35%) | 7,711<br>(16.31%) | 3,685<br>(7.80%) | 1,679<br>(3.55%) |

**Table S5.**

Statistics of significantly differentially expressed genes in Chinese soft-shelled turtle between male and female gonads on 15 to 23 days, 24 to 29 days and 33 to 45 days.

| Differentially expressed genes    | 15 to 23 days | 24 to 29 days | 33 to 45 days |
|-----------------------------------|---------------|---------------|---------------|
| Upregulated in the female gonad   | 765           | 12            | 196           |
| Downregulated in the female gonad | 210           | 31            | 104           |
| Total(up-plus downregulated)      | 975           | 43            | 300           |

Values indicate genes with  $\log_2FC > 1$  or  $\log_2FC < -1$  and false discovery rate (FDR)-corrected  $P$  value  $< 0.05$  in males compared with females.

**Table S6.**

2206 genes in Subcluster-1 and annotated information.

[See AB-1542\_Table S6.xlsx]

**Table S7.**

1006 genes in Subcluster-2 and annotated information.

[See AB-1542\_Table S7.xlsx]

**Table S8.**

3689 genes in Subcluster-3 and annotated information.

[See AB-1542\_Table S8.xlsx]
